# Supplementary material
Source: PubMed Central journal article supplement (PMC9362039)

**Supplementary Figure 1.** The big picture of 'multi-omics'. DNA is transcribed to RNA, and that is translated to protein to perform biological functions as proteomics. They are all influenced by external epidemiology factors as external environment. Genomics, transcriptome, proteomics, and epidemiology related informatics contribute to disease together as multi-omics.

Fig. 1

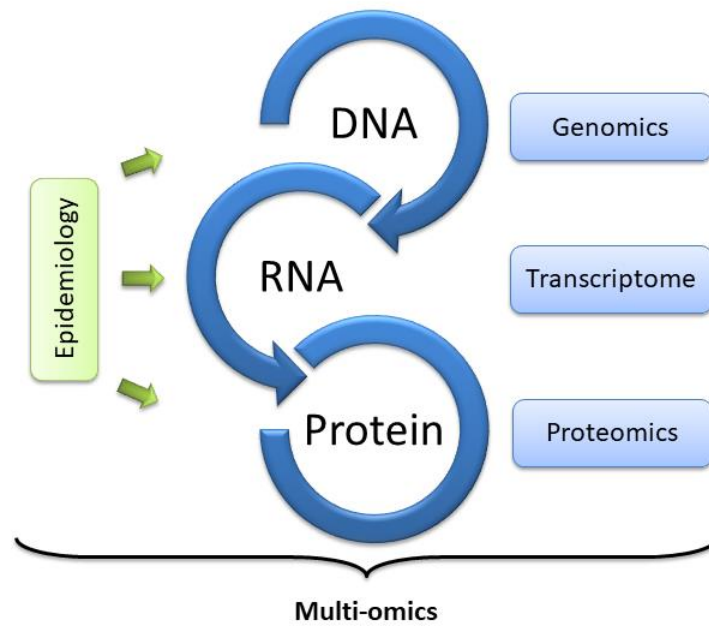

Supplement: 41374_2022_830_MOESM1_ESM.pdf [file 41374_2022_830_MOESM1_ESM.pdf]
